# Supplementary material for: Influence of a π-bridge dependent molecular configuration on the optical and electrical characteristics of organic solar cells
Source: Royal Society of Chemistry journal article supplement (doi:10.1039/c6ta02977a), 2016-01-01
Supplement: c6ta02977a1.pdf [file c6ta02977a1.pdf]

## Electronic Supplementary Information

For

### Influence of $\pi$ -bridge dependent molecular configuration on the optical and electrical characteristics for organic solar cells

Ting Wang,<sup>‡a</sup> Liangliang Han,<sup>‡a</sup> Huan Wei,<sup>a</sup> Dangqiang Zhu,<sup>a</sup> Xichang Bao,<sup>a</sup> Shanlin Qiao,<sup>a</sup>

Weizhi Sun,<sup>\*a</sup> Weichao Chen,<sup>\*a</sup> Renqiang Yang<sup>\*a,b</sup>

<sup>a</sup> CAS Key Laboratory of Bio-based Materials, Qingdao Institute of Bioenergy and Bioprocess Technology, Chinese Academy of Sciences, Qingdao 266101, China, Fax: +86-532-80662778. E-mails: sunwz@qibebt.ac.cn (W. S), chenwc@qibebt.ac.cn (W. C), yangrq@qibebt.ac.cn (R. Y)

<sup>b</sup> Institute of Polymer Optoelectronic Materials and Devices, State Key Laboratory of Luminescent Materials and Devices, South China University of Technology, Guangzhou 510640, China.

<sup>‡</sup> These authors contribute equally to this work.



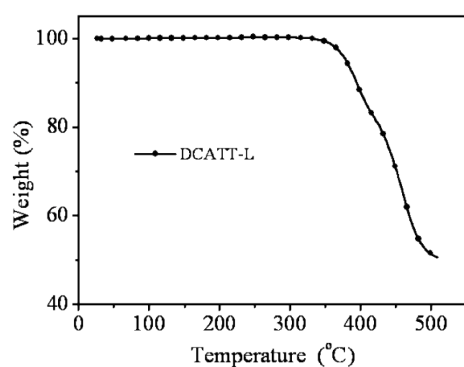

Fig. S4. TGA curve of DCATT-L with a heating rate of  $10\text{ }^{\circ}\text{C min}^{-1}$  under nitrogen atmosphere.

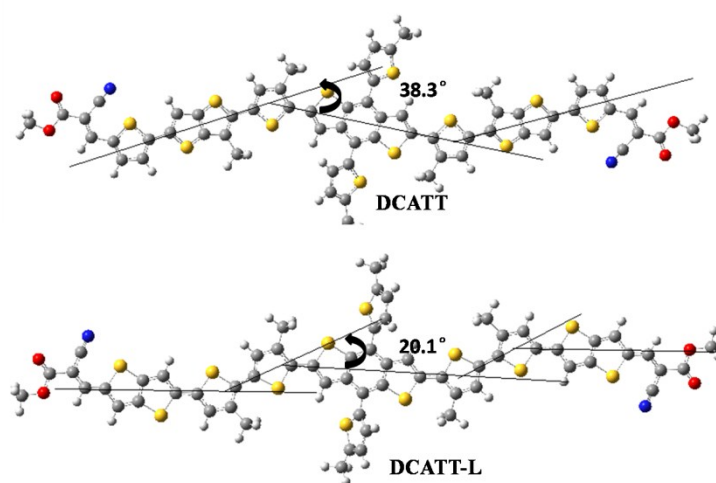

Fig. S5. Top views of the optimized geometries of the backbones of DCATT and DCATT-L with side chain replaced by methyl.

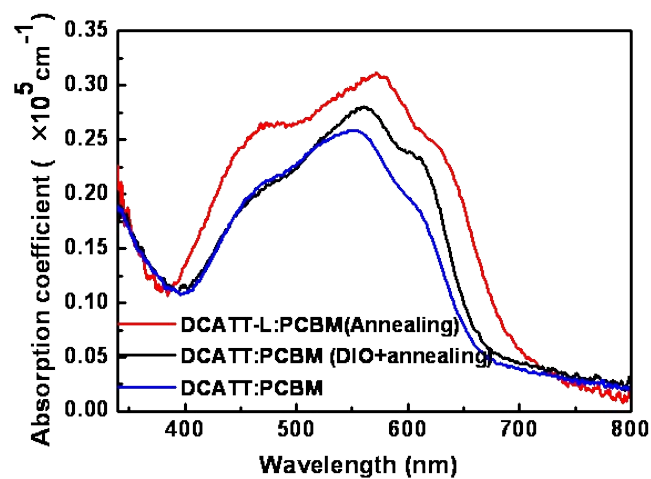

Fig. S6. UV-vis absorption spectra of blend films of DCATT-L:PC<sub>61</sub>BM after thermal annealing (red); DCATT:PC<sub>61</sub>BM with treatment of DIO and annealing (black); and DCATT:PC<sub>61</sub>BM without any treatment (blue).

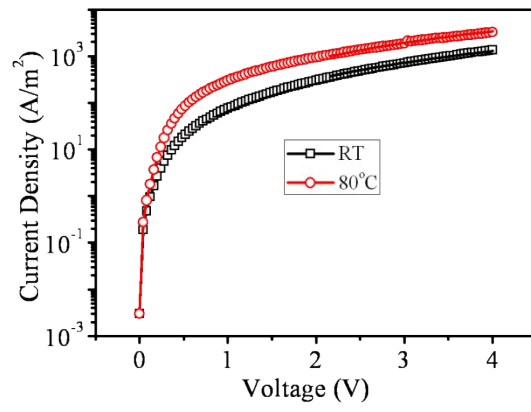

**Fig. S7.**  $J$ - $V$  curves of vertical diodes with the device structure of ITO/PEDOT:PSS/DCATT-L/Au.
